# Supplementary material for: Auxin Influx Carriers Control Vascular Patterning and Xylem Differentiation in Arabidopsis thaliana
Source: PubMed Central journal article supplement (PMC4414528; doi:10.1371/journal.pgen.1005183), 2015-04-29
Supplement: pgen.1005183.s018.pdf [file pgen.1005183.s018.pdf]

S1 Table . Table of parameters values ranges related to auxin transport

| Parameter (*)                  | Definition                                             | Value                          | Reference  |
|--------------------------------|--------------------------------------------------------|--------------------------------|------------|
| $V$                            | membrane potential                                     | $-100mV$                       | [8] (Ex)   |
| $f_{aH}^c$                     | fraction $AH/A$ in cells                               | 0.003                          | [8] (Ex)   |
| $f_{aH}^w$                     | fraction $AH/A$ in apoplast                            | 0.334                          | [8] (Ex)   |
| $f_{a^-}^c$                    | fraction $A^-/A$ in cells                              | 0.997                          | [8] (Ex)   |
| $f_{a^-}^w$                    | fraction $A^-/A$ in apoplast                           | 0.666                          | [8] (Ex)   |
| $p_{aH}$                       | membrane permeability $AH$                             | $3.3 \times 10^1 \mu m s^{-1}$ | [8] (Ex)   |
| $D_w$                          | auxin diffusion in walls                               | $0.389 - 0.5 \mu m s^{-1}$     | [4] (Ex)   |
| $\sigma_c$                     | auxin production                                       | $2 \mu M s^{-1}$               | - (**)     |
| $\nu_c$                        | auxin degradation                                      | $0.1 s^{-1}$                   | [3] (T)    |
| $p_{pin}$                      | efflux carrier permeability                            | $0.0278 - 0.278 \mu m s^{-1}$  | [4] (T,Ex) |
| $p_{aux}$                      | influx carrier permeability                            | $1.39 \mu m s^{-1}$            | [6] (T,Ex) |
| $L_a$                          | apoplast width                                         | $0.03 - 0.56 \mu m s^{-1}$     | [4] (T,Ex) |
| $L_c$                          | typical cell length                                    | $0.56 \mu m s^{-1}$            | [6] (T,Ex) |
| $\epsilon = L_a/L_c$           | -                                                      | $0.05 \mu m$                   | [3],       |
| $\Delta l = (L_a + L_c)$       | characteristic lattice length                          | $0.05$                         | [11] (T)   |
| $N(\phi)$                      | electrochemical factor for transport across a membrane | $5 \mu m$                      | - (***)    |
| $I = N(\phi)p_{aux}K_aI_0/L_a$ | influx intensity                                       | 3.97                           |            |
| $E = p_{pin}N(\phi)P_0/L_a$    | efflux intensity                                       | -                              |            |
| $D_{ca} = p_{aH}/L_a$          | diffusion rate of protonated auxin                     | -                              |            |
| $D = D_w/\Delta l^2$           | apoplastic diffusion rate                              | $7.78 - 660 s^{-1}$            |            |
|                                |                                                        | $1.6 - 41.7 s^{-1}$            |            |

(\*) Above the horizontal line, parameters inferred from experimental measurements (Ex) or just used in previous models (T). Below, combined and effective parameter ranges and values for the complete model, obtained from the above parameters. In our simulations we used parameters within these ranges (see in Text S1).

(\*\*) We do not know the auxin synthesis rate, but we take this approximate value so that it gives reasonable cytosolic concentrations.

(\*\*\*) We use this value as an approximation, since we do not know the cell length when the auxin pattern starts forming.
